# Supplementary material for: A multi-process model for the photocatalytic reduction of CO2
Source: Royal Society of Chemistry journal article supplement (doi:10.1039/d2cp03798j), 2022-01-01
Supplement: d2cp03798j1.pdf [file d2cp03798j1.pdf]

## Supporting Information

### A Multi-Process Model for Photocatalytic Reduction of CO<sub>2</sub>

Chen Sun, Yimin Xuan\*, Kai Zhang

School of Energy and Power Engineering, Nanjing University of Aeronautics and Astronautics, Nanjing 210001, China.

E-mail: [ymlxuan@nuaa.edu.cn](mailto:ymlxuan@nuaa.edu.cn)

#### 1. Methods

##### 1.1 DFT calculation

The generalized gradient approximation (GGA) of Perdew–Burke–Ernzerhof (PBE) is employed with the projected augmented-wave method for electronic exchange and correlation<sup>1</sup>. The kinetic cutoff energy for the plane-wave basis is set to 450 eV. During the model relaxing process, the threshold values of total electronic energies and the residual are set to 10<sup>-6</sup>eV and 0.05 eV /Å respectively. The Gaussian smearing method was used with the width of smearing equal to 0.05eV. Transition-State (TS) searches are calculated using the climbing image nudged elastic band (CI-NEB)<sup>2,3</sup>. The DFT-D3 method of Grimme was employed to describe the van der Waals (vdW) interaction<sup>4</sup>. The dielectric tensor is obtained using DFT calculations, the GW method<sup>5</sup>, and the Bethe-Salpeter Equation (BSE)<sup>6</sup>. The band structure is calculated with the PBE0 and Heyd-Scuseria-Ernzerhof (HSE)<sup>7</sup>.

To examine the stability of the catalysts structures, we also performed NVT Born–Oppenheimer AIMD (Ab-initio Molecular Dynamics) calculation with the temperature controlled using Langevin thermostat of friction coefficient of 10 ps<sup>-1</sup>. All simulations run for 10000 steps (10 ps), with the data collection starting after 1000 steps of equilibration.

##### 1.2 GW-Bethe Salpeter calculations

The widely used density functional theory (DFT) fails to predict the band gaps since there exists no formal justification to interpret the DFT eigenvalues as quasiparticle (QP) energies<sup>8</sup>. To solve this problem, the GW approximation is widely used, which generates better values for quasiparticle energies. GW quasiparticle calculations were carried out using the perturbative G<sub>0</sub>W<sub>0</sub> approximation, starting from Hybrid wavefunctions and eigenvalues as

described above. The energy cutoff for the function was set to 150eV and increasing it up to 480eV without changing the results for a fixed number (174) of empty bands. Calculations of the macroscopic dielectric tensor within the BSE framework are performed starting from  $G_0W_0$  eigenvalues. The k-point mesh is set as  $16 \times 16 \times 1$  Gamma-centered Monkhorst-packs in the calculation of the BSE spectra. The BSE Hamiltonian is formed using the 6 highest valence bands and the 8 lowest conduction bands using the Tamm-Dancoff approximation, and the dielectric tensor is output on the energy grid(3000 points) up to 6eV.

### 1.3 Carrier transport

The carrier recombination includes the radiative recombination and the non-radiative recombination. On the non-equilibrium condition, the radiative recombination rate can be expressed as<sup>9</sup>:

$$R_c = R_{c0} \frac{np}{n_0 p_0} \quad (1)$$

where  $R_{c0}$  is the semiconductor recombination rate in thermal equilibrium,  $n_0$  and  $p_0$  are the quasi-equilibrium concentrations of electrons and holes.

Non-radiative recombination mainly consists of Auger recombination, Shockley-Read-Hall (SRH) recombination, and surface recombination<sup>10</sup>. For Auger recombination, the rate of it can be expressed as:

$$R_a = (C_n n + C_p p)(np - n_{i,eff}^2) \quad (2)$$

where  $C_n$  and  $C_p$  are the electron and hole Auger recombination coefficients, respectively.  $n_{i,eff}$  is the effective intrinsic concentration of carrier, expressed as:

$$n_{i,eff} = \sqrt{N_{c0} N_{v0}} \exp\left(-\frac{E_g}{2k_b T}\right) \quad (3)$$

where  $N_{c0}$  and  $N_{v0}$  are effective state densities of conduction band and valence band,  $E_g$  is bandgap,  $k_b$  is boltzmann's constant, and T is temperature.

The rate of SRH recombination can be expressed as:

$$R_s = \frac{np - n_{i,eff}}{\tau_p n + \tau_n p} \quad (4)$$

where  $\tau_p$  and  $\tau_n$  are lifetime of hole and electron, respectively.

The quantity of photogenerated charge carriers is conserved in the whole photocatalytic processes, the equation of carrier conservation can be obtained:

$$R_g = R_c + R_a + R_s + R_r + R_{suf} \quad (5)$$

where  $R_r$  is the rate of surface reaction,  $R_{suf}$  is the rate of surface recombination.

For the sake of simplicity,  $R_g - R_c - R_a - R_s$  is defined as  $R_1$ . In our model, the value of  $R_r + R_{suf}$  is equal to  $R_1$  according to Eqn.(5). If  $R_r \leq R_1$ , the  $R_{suf}$  will be set to  $R_1 - R_r$  in the next step of iterative calculation. Oppositely,  $R_r$  is equal scale reduced to  $R_1$  in the iterative calculation.

#### 1.4 Mirco-kinetic Model

We employ a microkinetic model for the CO<sub>2</sub> and H<sub>2</sub> reduction reaction on the catalyst surface. In this model, the gaseous CO<sub>2</sub> molecules dissolved in the solution depends on the pressure and temperature, given by,

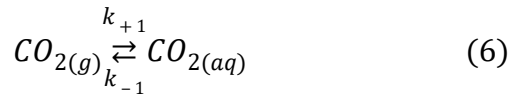

where the equilibrium  $K$  is given as:

$$K_0 = \frac{c_{co_2}}{f_{co_2}} = \exp\left\{93.4517\left(\frac{100}{T}\right) - 60.2409 + 23.3585\ln\left(\frac{T}{100}\right)\right\} \quad (7)$$

where  $c_{co_2}$  is the concentration of dissolved CO<sub>2</sub>, and  $f_{co_2}$  is the fugacity of CO<sub>2</sub> in gas phase.

The dissolved CO<sub>2</sub> may then adsorb on the surface of the catalyst, given by

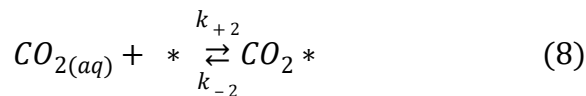

We performed ab initio DFT using the Vienna Ab Initio Simulation Package(VASP)<sup>1, 11</sup>, and numerical simulation using COMSOL Multiphysics®, as detailed below.

After being adsorbed on the surface, CO<sub>2</sub> may be reduced to HCOOH by several proton-coupled electron transfer steps. The corresponding pair of reactions is given by

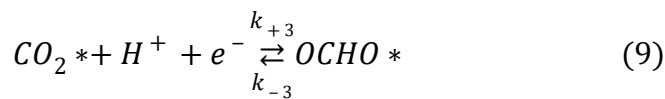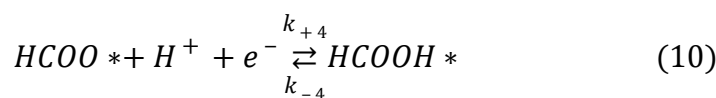

The CO<sub>2</sub> adsorbed on the surface also can be reduced to CO, given by

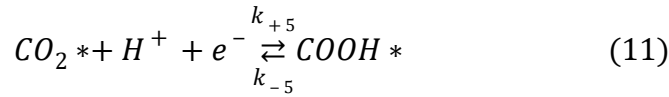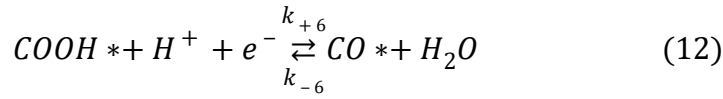

Alternatively, CO<sub>2</sub> can be reduced to CH<sub>4</sub>, given by

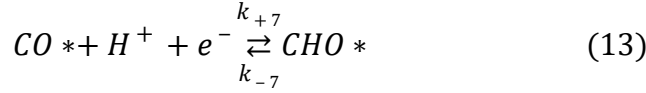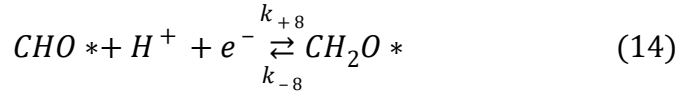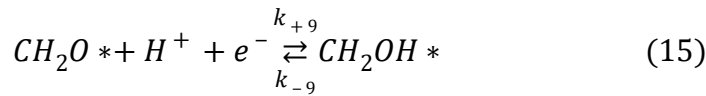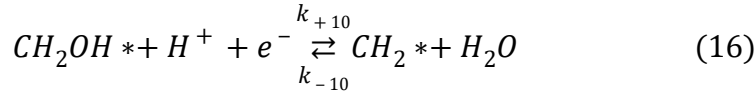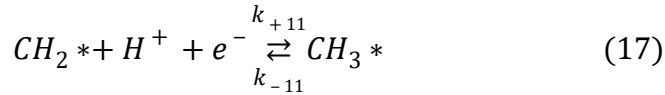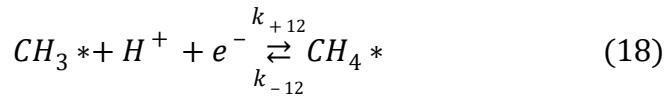

Rather than by the reduction of CH<sub>2</sub>O\* as in Eq10, CH<sub>2</sub>O can also be reduced to CH<sub>3</sub>OH, given by

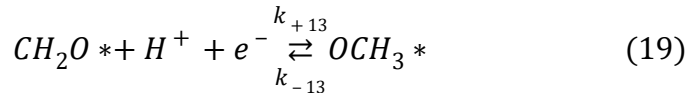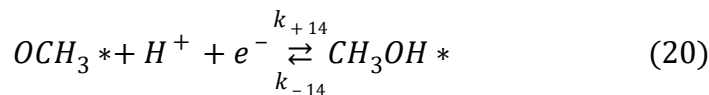

We also consider the HER given by Volmer and Heyrovsky steps.

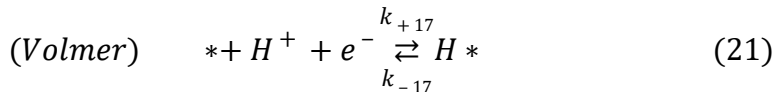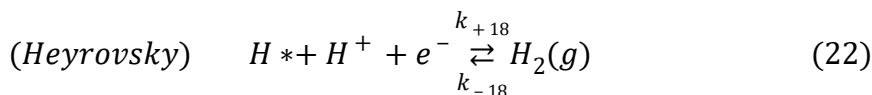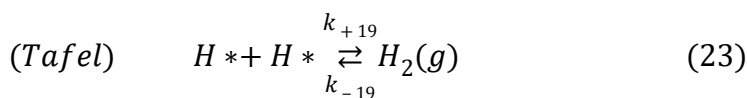

The dissociation of O<sub>2</sub> in one direct chemical step is also be included, given by

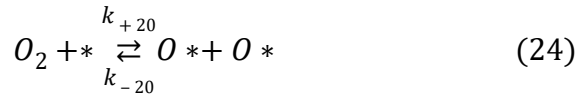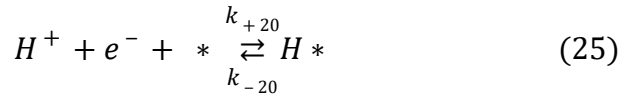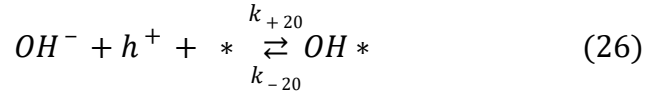

### 1.5 Continuum transport Model

The ionization equilibrium in solution are considered, as shown as:

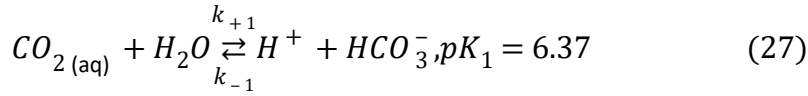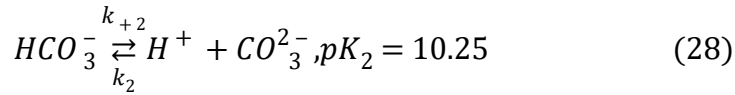

where  $k$  is the rate constant, and  $K$  is the reaction equilibrium constant.

### 1.6 Ratios of species in rGO–MoS<sub>2</sub>/PPy

The molar ratio of MoS<sub>2</sub> and PPy is calculated by the data of synthesis. The synthesized rGO–MoS<sub>2</sub> (66 wt% of MoS<sub>2</sub> in 100mg) was added with 150  $\mu L$  of pyrrole (98%)<sup>12</sup>. The mass fraction of MoS<sub>2</sub> and PPy(1 unit) are 160.07 and 65.09. In addition, the density of liquid PPy is 0.9691g/ml. Herein, these are 0.412 mmol MoS<sub>2</sub> and 2.188 mmol PPy in one sample of rGO–MoS<sub>2</sub>/PPy-150.

## 2. Supplementary Figures

**a**

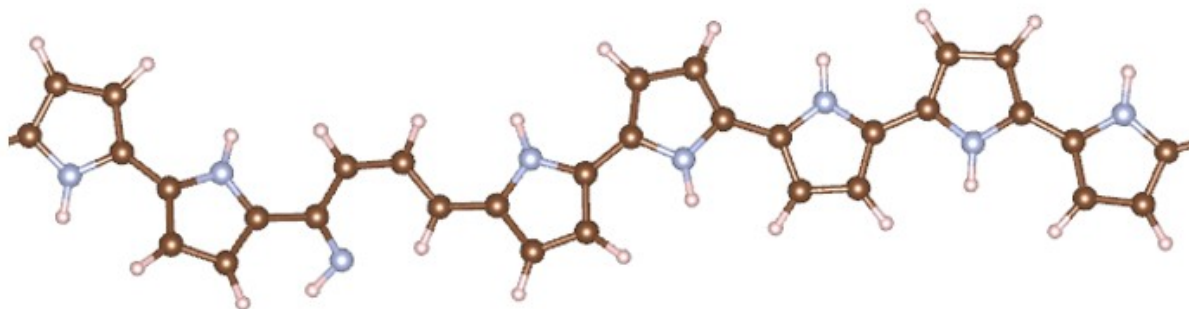

**b**

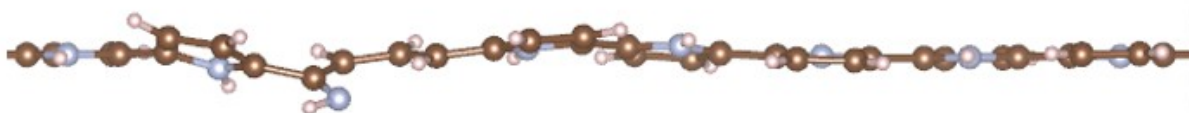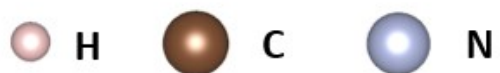

Figure S1. Structure of the PPy with C=N defect; (a)Top view;  
(b)Front view

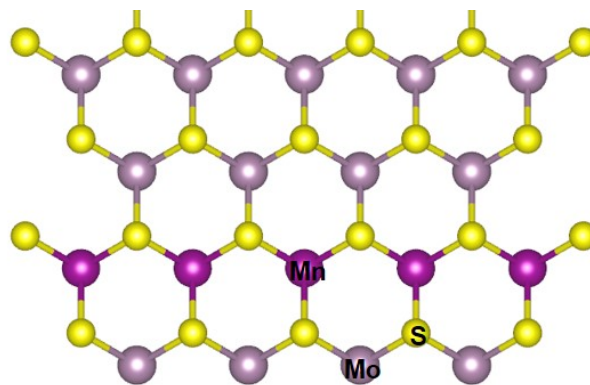

Figure S2. Structure of the m-MoS<sub>2</sub> with metal atom doped

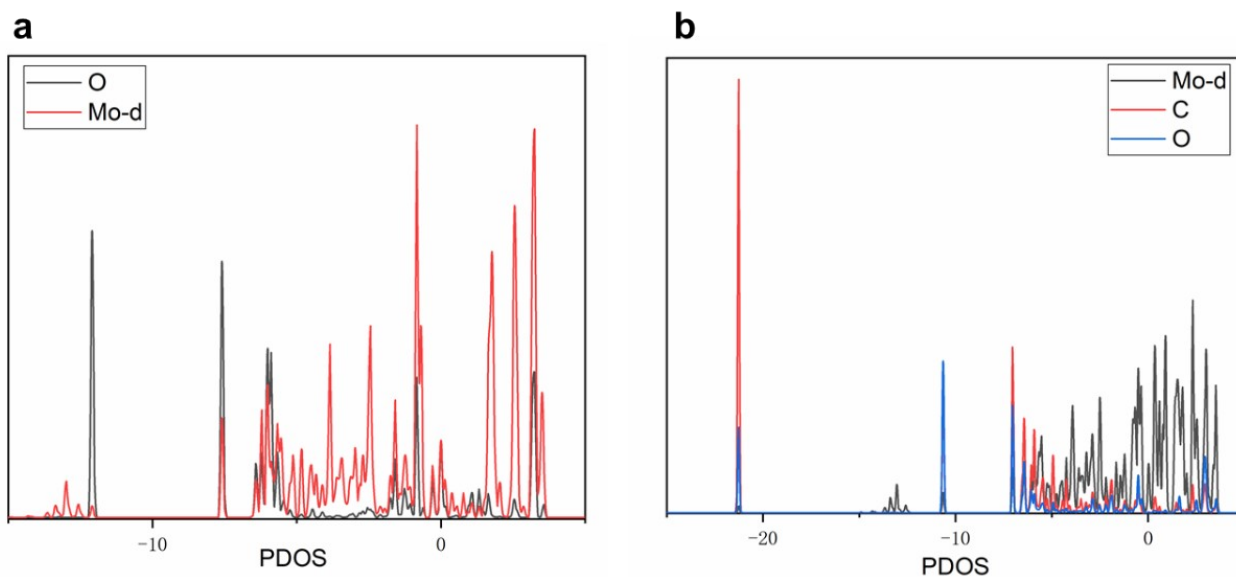

Figure S3. (a)PDOS of \*COH adsorbed on Mn doped MoS<sub>2</sub>. (b) DOS of \*CHO adsorbed on Mn doped MoS<sub>2</sub>

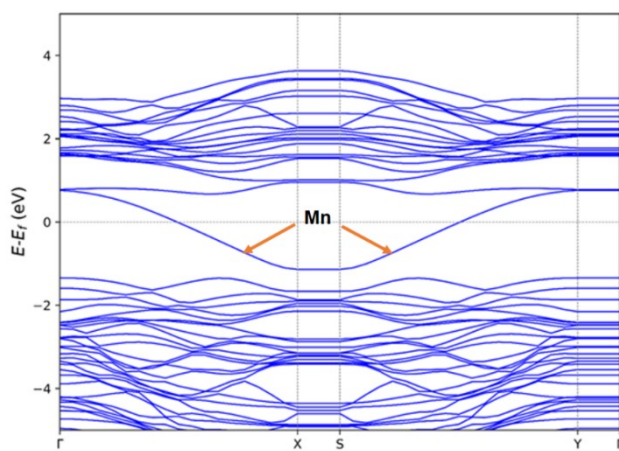

Figure S4. Band structure of Mn doped MoS<sub>2</sub>

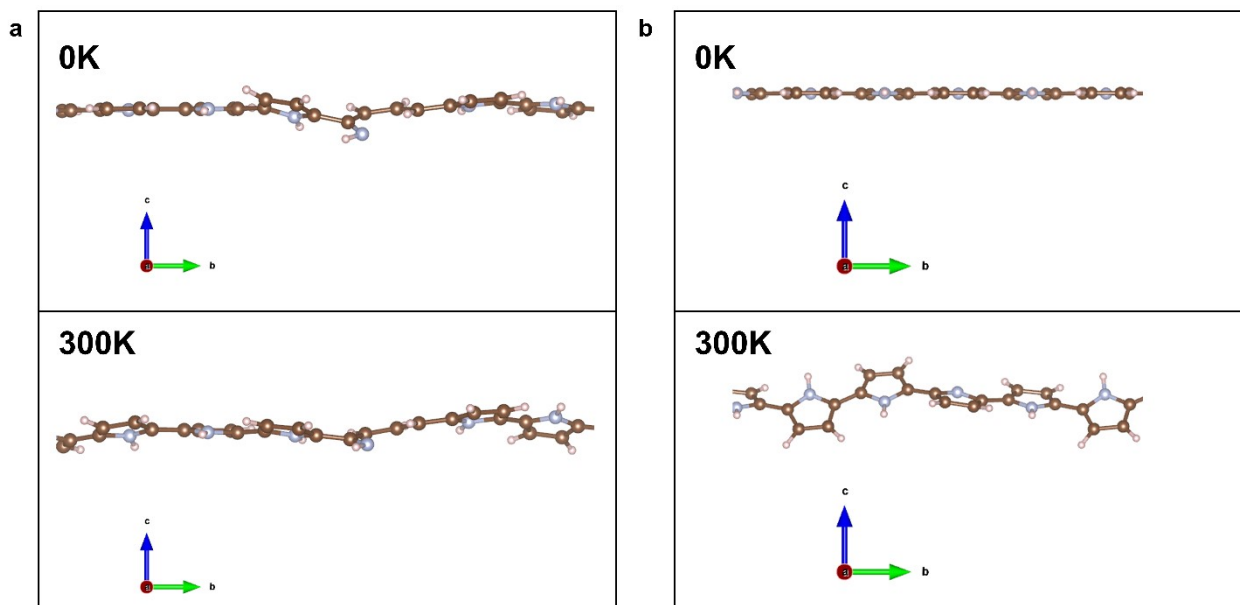

Figure S5. The results of AIMD simulations at 0K and 300K; (a) the AIMD simulation of Cd-PPy; (b) the AIMD simulation of PPy.

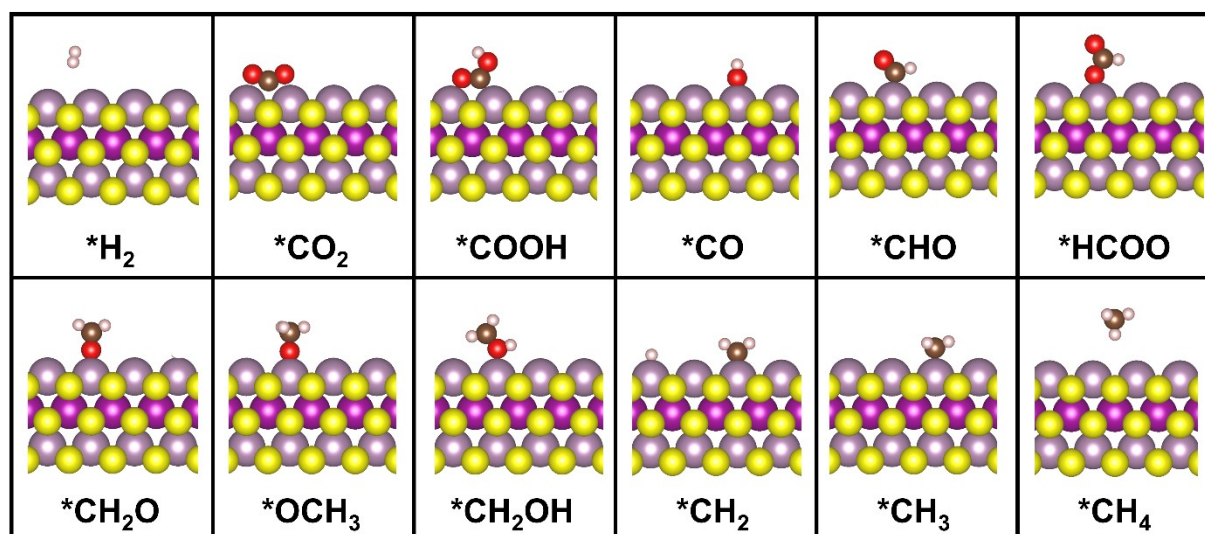

Figure S6. The structures of intermediates on dMoS<sub>2</sub>.



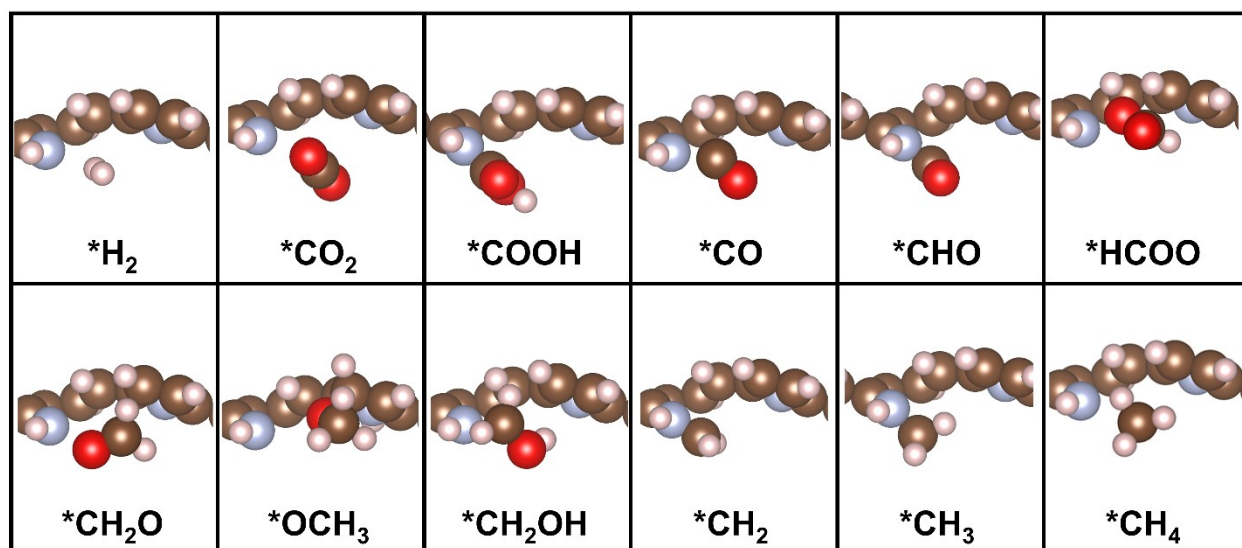

Figure S7. The structures of intermediates on Cd-PPy.

### 3. Supplementary Tables

Table S1. Adsorption of CO<sub>2</sub> on m-MoS<sub>2</sub>, PPy and Cd-PPy

|                    | $\Delta G_{ad}(eV)$ |
|--------------------|---------------------|
| m-MoS <sub>2</sub> | -1.68               |
| PPy                | -0.12               |
| Cd-PPy             | -0.77               |

Table S2. Diffusion coefficients of species in H<sub>2</sub>O at 300K<sup>13-15</sup>.

| Species                       | Diffusion Coefficient (10 <sup>-9</sup> m <sup>2</sup> s <sup>-1</sup> ) |
|-------------------------------|--------------------------------------------------------------------------|
| CO <sub>2</sub>               | 1.910                                                                    |
| HCO <sub>3</sub> <sup>-</sup> | 1.185                                                                    |
| CO <sub>3</sub> <sup>2-</sup> | 0.923                                                                    |
| H <sup>+</sup>                | 9.311                                                                    |
| OH <sup>-</sup>               | 5.273                                                                    |
| H <sub>2</sub>                | 5.11                                                                     |

|                    |      |
|--------------------|------|
| CO                 | 1.57 |
| HCOOH              | 1.52 |
| CH <sub>3</sub> OH | 1.28 |
| CH <sub>4</sub>    | 1.84 |
| O <sub>2</sub>     | 2.42 |

## Reference

1. J. P. Perdew, K. Burke and M. Ernzerhof, *Physical Review Letters*, 1996, **77**, 3865-3868.
2. D. Sheppard, P. Xiao, W. Chemelewski, D. D. Johnson and G. Henkelman, *J Chem Phys*, 2012, **136**, 074103.
3. R. M. Henkelman, G. J. Stanisz and S. J. Graham, *J Magn Reson Imaging*, 2000, **11**, 568.
4. S. Grimme, J. Antony, S. Ehrlich and H. Krieg, *J Chem Phys*, 2010, **132**, 154104.
5. M. S. Hybertsen and S. G. Louie, *Phys Rev B Condens Matter*, 1986, **34**, 5390-5413.
6. G. Onida, L. Reining and A. Rubio, *Reviews of Modern Physics*, 2002, **74**, 601-659.
7. J. Heyd, G. E. Scuseria and M. Ernzerhof, *The Journal of Chemical Physics*, 2006, **124**.
8. M. Shishkin and G. Kresse, *Physical Review B*, 2006, **74**.
9. W. Van Roosbroeck and W. Shockley, *Physical Review*, 1954, **94**, 1558-1560.
10. P. T. Landsberg, *Nature*, 1978, **275**, 270-271.
11. P. E. Blochl, *Phys Rev B Condens Matter*, 1994, **50**, 17953-17979.
12. N. Kumar, S. Kumar, R. Gusain, N. Manyala, S. Eslava and S. S. Ray, *ACS Applied Energy Materials*, 2020, **3**, 9897-9909.
13. M. Flury and T. F. Gimmi, *6.2 Solute Diffusion*, Methods of Soil Analysis, Part 4, Physical Methods, 2002.
14. D. W. H. Rankin, *CRC handbook of chemistry and physics, 89th edition*, edited by David R. Lide, 2009.
15. B. Jähne, G. Heinz and W. Dietrich, *Journal of Geophysical Research*, 1987, **92**.
